# Supplementary material
Source: publisher site journal article supplement (https://www.dovepress.com/article/500522)
Supplement: Supplementary file 1 [file get_supplementary_file.php]

# **Supplementary Material**

| **Supplementary Table 1**: Biochemical phenotyping for the recruited population, stratified for Females and Males groups. Data are reported as Median [Interquartile Range - IQR]. | | | |
| --- | --- | --- | --- |
|  | **T0** | **T1** | **T2** |
| **RBC (109/l)** |  |  |  |
| Males | 5.08 [4.85; 5.38] | 5.08 [4.86; 5.39] | 5.24 [4.44; 5.58] |
| Females | 4.5 [4.29; 4.76] | 4.48 [4.28; 4.59] | 4.55 [4.32; 4.83] |
| **WBC (1012/l)** |  |  |  |
| Males | 7.97 [6.35; 9.65] | 7.73 [6.58; 8.38] | 7.85 [7.08; 8.5] |
| Females | 6.75 [5.64; 8.05] | 6.59 [5.09; 7.8] | 7.05 [5.64; 7.9] |
| **PLT (109/l)** | 247 [198; 278] | 239 [184; 263] | 235 [195.5; 281.5] |
| **Glycaemia (mg/dl)** | 93 [84; 107] | 91 [81.5; 105] | 92 [79; 97] |
| **CRP (mg/l)** | 0.145 [0.07; 0.42] | 0.14 [0.08; 0.25] | 0.17 [0.1; 0.26] |
| **Ferritin (ng/ml)** |  |  |  |
| Males | 105 [67; 155] | 167 [112; 241.5] | 163 [92; 291] |
| Females | 43 [22.25; 75.5] | 33 [13; 63] | 24 [10; 61] |
| **AST (ng/ml)** |  |  |  |
| Males | 22 [16; 24.5] | 24 [19.65; 26] | 20 [18; 27.5] |
| Females | 18 [15; 21.75] | 16 [15; 19] | 17 [15; 24] |
| **ALT (ng/ml)** |  |  |  |
| Males | 22 [16; 24.5] | 24 [20; 51] | 14 [13.5; 35.5] |
| Females | 17 [14.25; 21] | 17 [13; 20] | 15 [11; 19] |
| RBC: Red Blood Cells; WBC; White Blood Cells; PLT: Platelets; CRP: C-Reactive Protein; AST: Aspartate transaminase; ALT: Alanine transaminase. | | | |

| **Supplementary Table 2**: Numeric Pain Scale Rate (NPRS) score. NPRS is reported as Mean ± Standard Deviation for the three time points. Mean Differences throughout times are reported as Mean (95% Confidence Interval). p<0.05 were considered statistically significant and represented in bold. | | | |
| --- | --- | --- | --- |
|  | **T0** | **T1** | **T2** |
| **NPRS** | 8.12 ± 1.6 | 6.64 ± 1.93 | 5.08 ± 2.01 |
|  |  | **ΔT0-T1** | **ΔT1-T2** |
| **Mean (95% CI)** | - | 1.48 (0.82 – 2.13) | 1.55 (0.798 – 2.32) |
| **p** |  | **<0.001** | **<0.001** |
|  |  |  | **ΔT0-T2** |
| **Mean (95% CI)** | - | - | 3.04 (2.35 – 3.73) |
| **p** |  |  | **<0.001** |

| **Supplementary Table 3:** APC screening for Cytokines, Chemokines and Growth factors at both T0 and T1. Results are indicated as median [IQR] and expressed as picograms/milliliters (pg/ml). | | | | | |
| --- | --- | --- | --- | --- | --- |
| **Marker** | **T0 APC** | **T1 APC** | **Paired  p** | **Fold Change** | |
| **Est (95% CI)** | **p** |
| **IL-1β** | 0.79 [0.57; 1.15] | 0.71 [0.57; 1.01] | 0.11 | 1.06 (0.72 – 1.39) | 0.737 |
| **IL-1ra** | 206 [165; 293] | 206 [165; 260] | 0.121 | 0.92 (0.79 – 1.05) | 0.233 |
| **IL-2** | 3.04 [2.05; 4.72] | 2.55 [0.903; 6.96] | 0.713 | 1.16 (0.96 – 1.36) | 0.121 |
| **IL-4** | 2.43 [1.91; 3.2] | 2.68 [2.05; 3.40] | 0.789 | 1.16 (-0.17 – 2.50) | 0.755 |
| **IL-5** | 43.6 [43.6; 54] | 45.1 [29.9; 70.1] | 0.424 | 1.25 (0.99 – 1.51) | 0.056 |
| **IL-8** | 6.87 [5.88; 8.37] | 7.87 [5.88; 8.87] | 0.35 | 1.14 (0.81 – 1.91) | 0.136 |
| **IL-9** | 329 [284; 379] | 292 [274; 311] | 0.964 | 1.10 (0.92 – 1.29) | 0.259 |
| **IL-10** | 4.98 [3.51; 7.9] | 4.98 [4.12; 9.46] | 0.898 | 1.04 (0.95 – 1.12) | 0.421 |
| **IL-12** | 26.8 [17.3; 41] | 22.1 [14.9; 36.3] | 0.863 | 1.28 (0.90 – 1.66) | 0.144 |
| **IL-13** | 2.65 [2.16; 4.47] | 3.12 [2.16; 4.91] | 0.701 | 1.30 (0.83 – 1.77) | 0.205 |
| **IL-17** | 29.1 [25.7; 32.5] | 29.4 [23.5; 34.1] | 0.882 | 1.12 (0.85 – 1.38) | 0.378 |
| **Eotaxin** | 49 [33.1; 65.7] | 41.2 [33.2; 58.2] | 0.982 | 1.07 (0.92 – 1.23) | 0.331 |
| **bFGF** | 20.6 [16.8; 25.1] | 18.8 [16.8; 24.3] | 0.247 | 1.14 (0.99 – 1.30) | 0.063 |
| **G-CSF** | 109 [87.9; 151] | 119 [93.2; 140] | 0.999 | 1.13 (0.92 – 1.34) | 0.215 |
| **GM-CSF** | 3.51 [2.25; 5.18] | 3.8 [2.9; 5.05] | 0.757 | 1.06 (0.91 – 1.22) | 0.418 |
| **IFN-γ** | 9.63 [8.07; 12.5] | 8.93 [8.24; 12.1] | 0.682 | 2.93 (-0.45 – 6.32) | 0.251 |
| **IP-10** | 230 [155; 332] | 168 [132; 246] | 0.782 | 1.06 (0.88 – 1.24) | 0.497 |
| **MCP-1** | 15.7 [12.6; 24.5] | 13 [10.2; 19.4] | 0.112 | 0.95 (0.81 – 1.10) | 0.491 |
| **MIP-1α** | 1.73 [1.44; 2.12] | 1.86 [1.59; 1.99] | 0.915 | 1.09 (0.91 – 1.27) | 0.319 |
| **MIP-1β** | 132 [108; 149] | 118 [103; 128] | 0.782 | 1.08 (0.93 – 1.24) | 0.274 |
| **PDGF** | 423.22 [232.01; 688.56] | 331 [143;488] | 0.639 | 1.05 (0.95 – 1.14) | 0.325 |
| **RANTES** | 2823 [2201; 4399] | 2367 [1836; 2532] | 0.221 | 1.03 (0.85 – 1.20) | 0.762 |
| **TNF-α** | 140 [119; 174] | 121 [106; 132] | 0.925 | 1.03 (0.93 – 1.14) | 0.519 |
| **VEGF** | 148 [68.7; 202] | 141 [96.5; 186] | 0.683 | 1.89 (0.66 – 3.11) | 0.147 |

| **Supplementary Table 4: Biometrical, biochemical and clinical phenotyping for early responders and poor early responders at T1**. PB and APC cytokines are reported as pg/ml. p-values in bold denote statistical significance (p<0.05). | | | |
| --- | --- | --- | --- |
|  | **Poor Early Responders (n: 23)** | **Early Responders (n: 28)** | **p** |
| **Sex (Females)** | 17 (73.91%) | 23 (82.14%) | 0.514 |
| **Age (years)** | 67.7 ± 8.27 | 66.9 ± 11.7 | 0.778 |
| **Weight (Kg)** | 78 [68; 88] | 77 [65; 80] | 0.159 |
| **Height (m)** | 1.65 [1.60; 1.69] | 1.60 [1.59; 1.70] | 0.199 |
| **BMI (Kg/m2)** | 27.3 [24.2; 32.4] | 28.1 [24.6; 30.9] | 0.919 |
| **Obese** | 10 (43.48%) | 9 (32.14%) | 0.563 |
| **Diabetes** | 4 (17.39%) | 5 (17.86%) | 0.999 |
| **Smoker** | 6 (26.09%) | 10 (35.71%) | 0.552 |
| **T0 NPRS** | 7.39 ± 1.48 | 8.71 ± 1.46 | **0.003** |
| **RBC (109/l)** | 4.73 [4.30; 5.01] | 4.61 [4.12; 4.96] | 0.356 |
| **WBC (1012/l)** | 8.05 [6.57; 10.4] | 6.3 [5.33; 7.88] | **0.005** |
| **PLT (109/l)** | 248 [202; 275] | 244 [192; 290] | 0.655 |
| **PB MCP-1** | 11.83 [10.23; 16.46] | 20.16 [12.03; 25.52] | **0.012** |
| **APC PDGF** | 274.9 [155.47; 446.52] | 486.6 [335.7; 688.56] | **0.009** |
| **APC RANTES** | 2462 [2128; 3101] | 3554 [2375; 4888] | **0.023** |
| **APC VEGF** | 139.65 [72.67; 163.4] | 171.06 [114.48; 235.79] | **0.027** |

| **Supplementary Table 5: Biometrical, Biochemical and Clinical phenotyping for** **Responders and Non-Responders at T2.** Peripheral Blood and APC cytokines are reported as pg/ml.p-values in bold denote statistical significance (p<0.05). | | | | |
| --- | --- | --- | --- | --- |
|  | **Low Responders (n: 12)** | **Mid Responders**  **(n: 23)** | **High Responders**  **(n: 16)** | **p** |
| **Sex (Females)** | 10 (83.3%) | 15 (65.2%) | 15 (93.8%) | 0.092 |
| **Age (years)** | 68 ± 12.3 | 65.82 ± 7.35 | 68.6 ± 12.3 | 0.679 |
| **Weight (Kg)** | 79 [70.5; 85.75] | 80 [69; 83.5] | 70 [65; 73.5] | 0.095 |
| **Height (m)** | 1.62 [1.6; 1.67] | 1.67 [1.6; 1.71] | 1.6 [1.6; 1.68] | 0.263 |
| **BMI (Kg/m2)** | 29.24 [25.36; 33.45] | 29.43 [26.26; 31.05] | 26.44 [24.23; 27.73] | 0.183 |
| **Obese** | 6 (50%) | 11 (47.8%) | 2 (12.5%) | 0.062 |
| **Diabetes** | 4 (33.3%) | 3 (13%) | 2 (12.5%) | 0.265 |
| **Smoker** | 2 (16.7%) | 9 (39.1%) | 4 (25%) | 0.344 |
| **T0 NPRS** | 6.54 ± 1.34 | 8.46 ± 1.32 | 8.81 ± 1.39 | **<0.001** |
| **RBC (109/l)** | 4.61 [4.26; 4.78] | 4.62 [4.28; 5.13] | 4.7 [4.39; 4.99] | 0.554 |
| **WBC (1012/l)** | 9.09 [6.54; 10.31] | 7.65 [6.39; 8.48] | 6.15 [5.43; 6.78] | **0.015** |
| **PLT (109/l)** | 265 [250.25; 280.5] | 236.5 [202; 274.25] | 244 [186.5; 278.5] | 0.452 |
| **APC PDGF** | 155.5 [141.1; 469.8] | 411.1 [281.6; 526.6] | 494 [340.9; 652.5] | **0.004** |


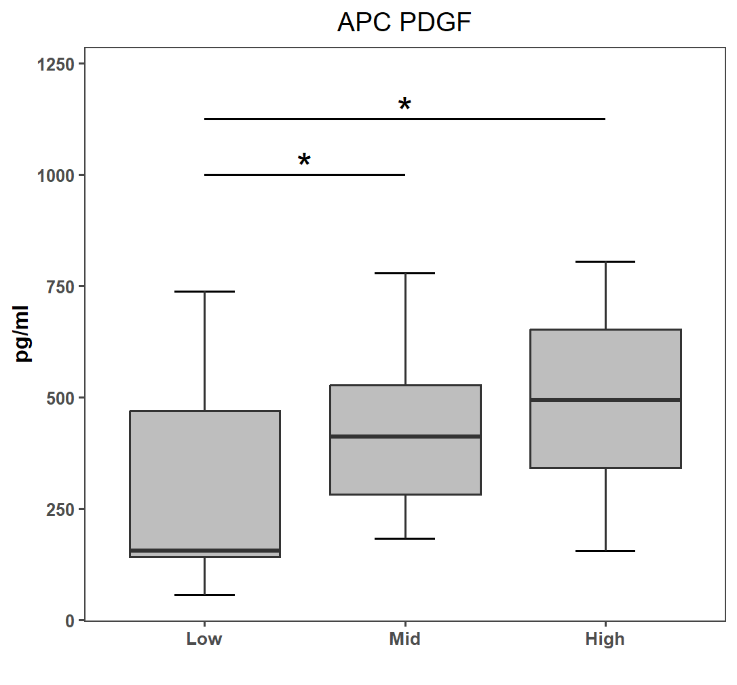


**Supplementary Figure 1 –** **Soluble factors in APC in overall responders**. Boxplots denote PDGF concentrations in APC at T0 for patients displaying Low, Mid and High response to therapy at T2 (as described in the text). PDGF concentration in APC is expressed as pg/ml. Asterisks denote statistical significance (*: p<0.05).

| **Supplementary Table 6**: Biometrical, Biochemical and Clinical phenotyping for optimal responders and never responders through T1 and T2. PB and APC cytokines are reported as pg/ml. p-values in bold denote statistical significance (p<0.05). | | | |
| --- | --- | --- | --- |
|  | **Never Responders (n: 8)** | **Optimal Responder (n: 11)** | **p** |
| **Sex (Females, %)** | F: 6 (75%) | F: 10 (90.91%) | 0.546 |
| **Age (years)** | 66.25 ± 7.27 | 65.64 ± 12.08 | 0.806 |
| **Weight (Kg)** | 79 [71.75; 94.25] | 72 [65.75; 79] | 0.163 |
| **Height (m)** | 1.64 [1.62; 1.69] | 1.6 [1.53; 1.64] | 0.587 |
| **BMI (Kg/m2)** | 30.48 [25.32; 34.28] | 28.51 [26.66; 30.5] | 0.485 |
| **Obese** | 5 (62.5%) | 3 (30%) | 0.342 |
| **Diabetes** | 2 (25%) | 1 (9.09%) | 0.546 |
| **Smoker** | 1 (12.5%) | 2 (18.18%) | 0.999 |
| **T0 NPRS** | 6.62 ± 1.41 | 9.05 ± 1.56 | **0.004** |
| **RBC (109/l)** | 4.42 [4.22; 4.75] | 4.5 [4.06; 4.9] | 0.707 |
| **WBC (1012/l)** | 9.83 [9.22; 10.44] | 5.91 [4.84; 6.19] | **0.008** |
| **PLT (109/l)** | 248 [245; 257] | 205 [171; 258] | 0.571 |
| **APC MIP-1α** | 2.12 [1.85; 2.22] | 1.59 [1.16; 1.79] | **0.033** |
| **APC PDGF** | 189.79 [115.02; 400.77] | 467.86 [358.21; 670.54] | **0.027** |
| **APC VEGF** | 76.67 [42.57; 152.43] | 181.74 [143.64; 238.35] | **0.032** |
